# Supplementary material for: Caractérisation des aciers par bruit Barkhausen (interaction microstructure cristalline/microstructure magnétique) : optimisation de la mise en œuvre pour un développement industriel : Application au contrôle des traitements superficiels
Source: Atypon-hosted journal article supplement (doi:10.1176/appi.ps.201100280), 1997-01-01
Supplement: pss6302_0147_ds.pdf [file pss6302_0147_ds.pdf]

**Appendix:**  
**Additional Information on Patterns of Re-diagnoses**

*Change to Nonpsychotic Disorder*

After assessment by the CCS, the 4 schizophrenia cases were re-diagnosed at the CCS with adjustment disorder, major depression (without psychotic features), bipolar affective disorder, and PTSD, respectively. The 2 schizoaffective disorder cases were diagnosed with major depression with psychotic features and eating disorder (bulimia nervosa) respectively. The 1 case of brief psychotic disorder was re-diagnosed as bipolar affective disorder, while the 1 case of delusional disorder was re-diagnosed as adjustment disorder. Of the 26 cases of psychosis not otherwise specified, 10 were re-diagnosed as major depression (of which 3 were major depression with psychotic features), 6 were re-diagnosed as PTSD, 3 got re-diagnosed as adjustment disorder, while 1 got re-diagnosed as bipolar affective disorder.

*Change to Psychotic Disorder*

After assessment by the CCS, 3 cases of major depression with psychotic features were re-diagnosed with schizophrenia, schizophreniform disorder and psychosis not otherwise specified, respectively. The 2 cases of major depression (without psychotic features) were re-diagnosed as delusional disorder and psychosis not otherwise specified respectively. The 2 bipolar affective disorder cases were re-diagnosed as schizoaffective disorder and psychosis not otherwise specified respectively, the 2 PTSD cases were re-diagnosed as psychosis not otherwise specified, and the 2 anxiety disorders as delusional disorder. One case of adjustment disorder was re-diagnosed as delusional disorder
